# Supplementary material
Source: PubMed Central journal article supplement (PMC6999251)
Supplement: ELSC-18-334-s001.pdf [file ELSC-18-334-s001.pdf]

# **The chemo enzymatic functionalization of chitosan zeolite particles provides antioxidant and antimicrobial properties**

## **Supporting Information**

Gregor Tegl<sup>1</sup>, Viktoria Stagl<sup>1</sup>, Anna Mensah<sup>1</sup>, Daniela Huber<sup>1</sup>, Walter Somitsch<sup>2</sup>, Stefanie Grosse-Kracht<sup>2</sup>, Georg M Guebitz<sup>1,3</sup>

<sup>1</sup> Institute of Environmental Biotechnology, BOKU–University of Natural Resources and Life Sciences, Vienna, Konrad Lorenz Straße 20, 3430 Tulln an der Donau, Austria

<sup>2</sup> IPUS Mineral- und Umwelttechnologie GmbH, Werksgasse 281, 8786 Rottenmann, Austria

<sup>3</sup> ACIB–Austrian Centre of Industrial Biotechnology, Konrad Lorenz Straße 20, 3430 Tulln, Austria

### **Correspondence:**

Gregor Tegl

[gregor.tegl@gmail.com](mailto:gregor.tegl@gmail.com)

Institute of Environmental Biotechnology, BOKU–University of Natural Resources and Life Sciences, Vienna, Konrad Lorenz Straße 20, 3430 Tulln an der Donau, Austria

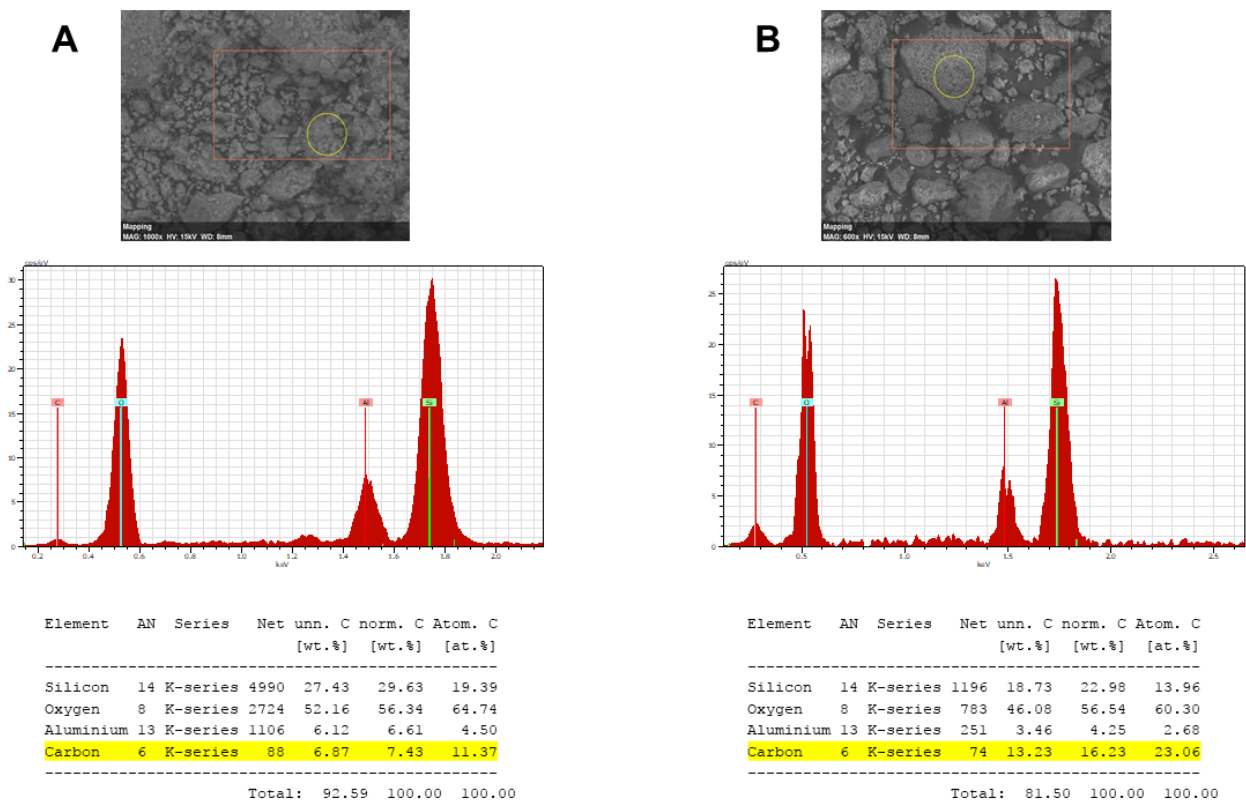

Figure S1: Raw data from EDX measurements of (A) CTS-zeolite and (B) CA-CTS-zeolite, including (from up to down): mapping window, EDX spectrum, table with element composition.
